# Supplementary material
Source: PubMed Central journal article supplement (PMC4543997)
Supplement: ja5b05602_si_001.pdf [file ja5b05602_si_001.pdf]

Supporting Information for:

## Tuning the Optical Properties of Cesium Lead Halide Perovskite Nanocrystals by Anion Exchange Reactions

Quinten A. Akkerman<sup>†</sup>, Valerio D’Innocenzo<sup>‡</sup>, Sara Accornero<sup>†</sup>, Alice Scarpellini<sup>†</sup>, Annamaria Petrozza<sup>‡</sup>, Mirko Prato<sup>†\*</sup>, and Liberato Manna<sup>†\*</sup>

<sup>†</sup> Nanochemistry Dept., Istituto Italiano di Tecnologia, Via Morego 30, 16163 Genova, Italy

<sup>‡</sup> Center for Nano Science and Technology @Polimi, Istituto Italiano di Tecnologia, via Giovanni Pascoli 70/3, 20133 Milano, Italy

**\*Corresponding Authors**

[mirko.prato@iit.it](mailto:mirko.prato@iit.it), [liberato.manna@iit.it](mailto:liberato.manna@iit.it)

### Additional Experimental Data

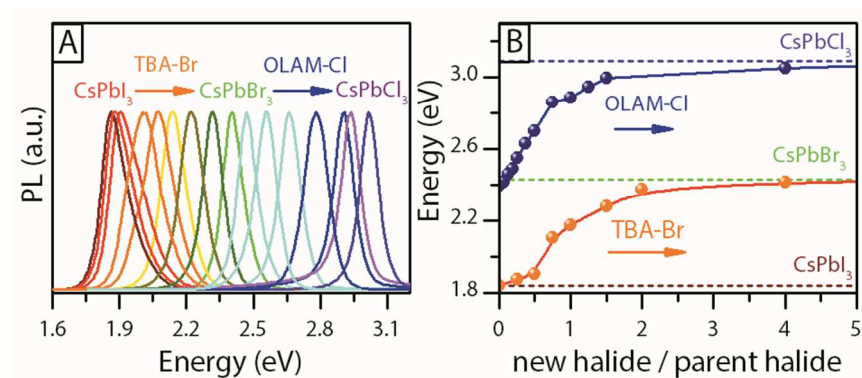

**Figure S1.** PL spectra of the CsPbX<sub>3</sub> NCs prepared by anion exchange, using TBA-Br and OLAM-Cl. (B) PL calibration curves based on the I<sup>-</sup> (for using TBA-Br) and Br<sup>-</sup> (for using OLAM-Cl) amount in the starting NCs. The curves are reported as a function of the molar ratio between the added halide and the Br amount in the starting NCs.

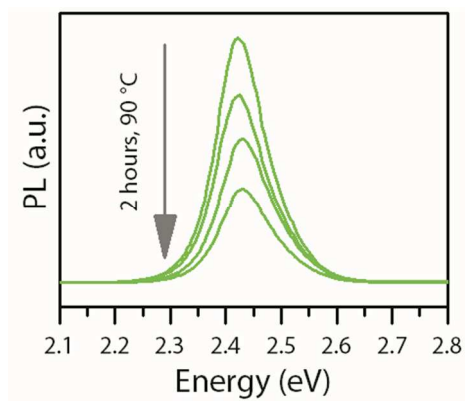

**Figure S12.** PL spectra measured overtime (2 hours) on CsPbBr<sub>3</sub> NCs dispersed in TOL and heated at 90°C.

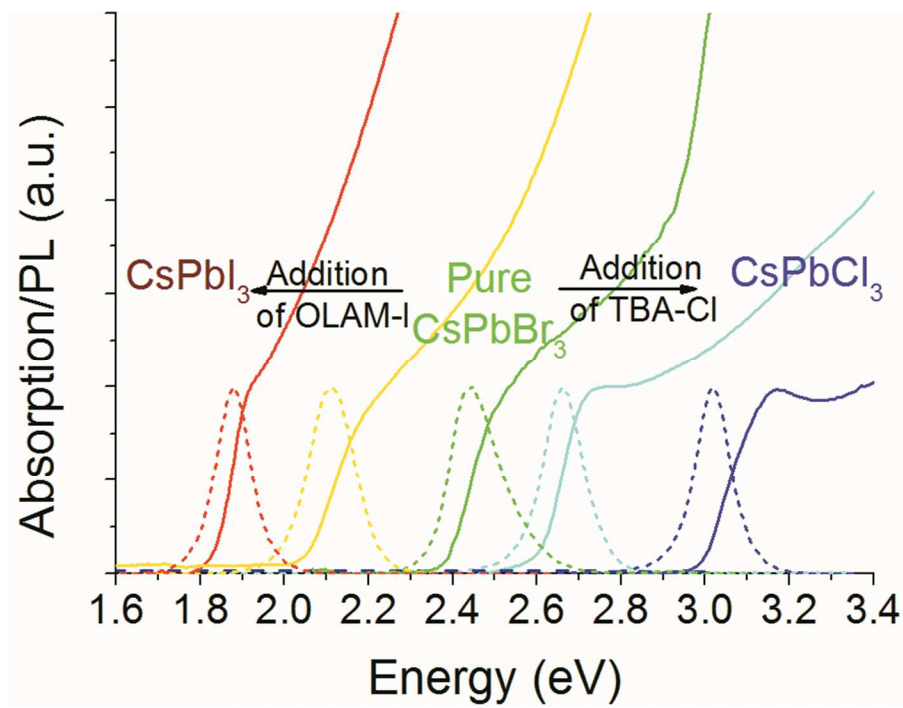

**Figure SI3.** Optical Absorption and PL spectra of CsPbX<sub>3</sub> NCs prepared by anion exchange.

**Comparison of optical properties and diffraction patterns of the NCs prepared by direct synthesis with those prepared by anion exchange.**

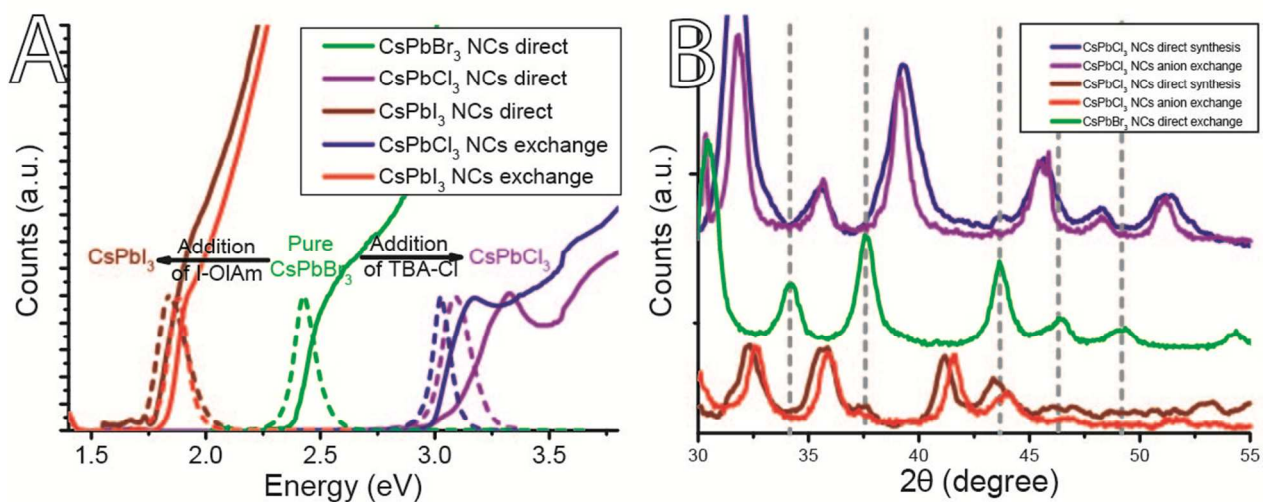

**Figure SI4.** Optical absorption and PL spectra (A) and XRD patterns (B) of directly synthesized CsPbX<sub>3</sub> NCs (X=Cl, Br, I) and of CsPbX<sub>3</sub> NCs (X=Cl, Br) prepared by anion exchange. Only minor differences can be seen in both optical spectra and XRD patterns of the NCs prepared by anion exchange with respect to the spectra and XRD patterns of the corresponding NCs prepared by direct synthesis, corroborating the almost complete anion exchange

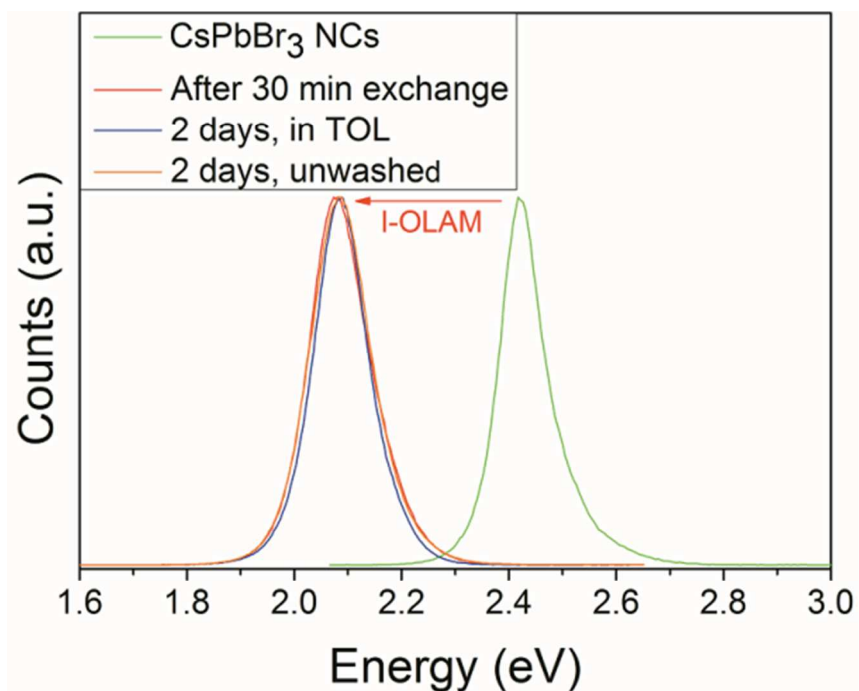

**Figure SI5.** Green spectrum: PL of initial CsPbBr<sub>3</sub> NCs. Red spectrum: PL of the exchanged NCs (with I-OLAM), recorded 30 minutes after the exchange reaction; Orange spectrum: PL of the same sample of exchanged NCs, recorded 2 days later; Blue spectrum: PL of a sample of NCs cleaned after exchange (by centrifugation and re-dispersion in toluene), recorded 2 days later. All exchanged samples had the same PL emission peak and linewidth, regardless of the time from exchange at which the PL was recorded and regardless of whether the samples were crude solutions or cleaned ones.

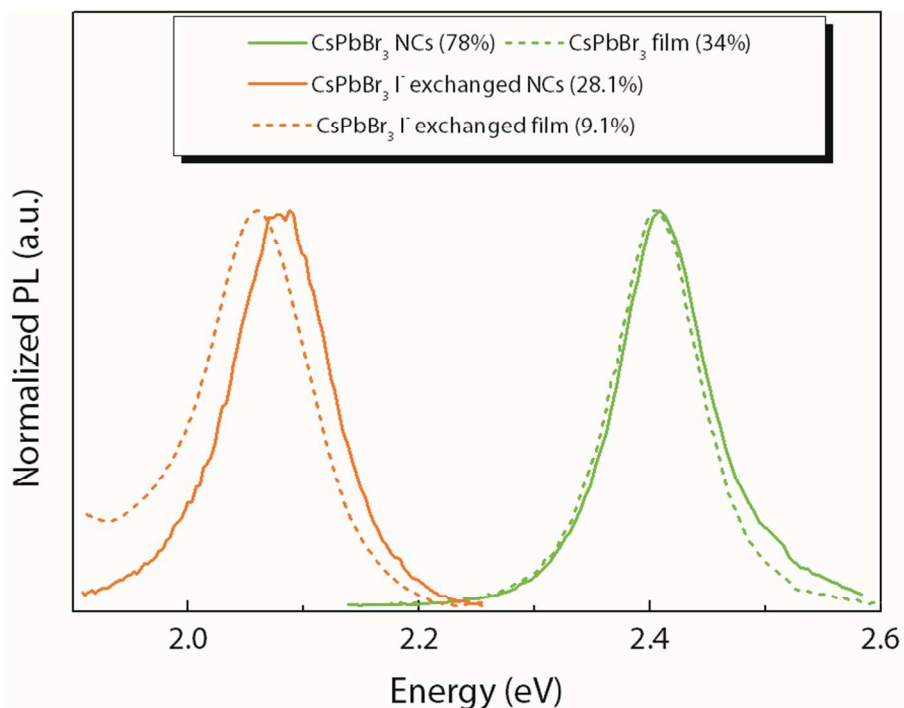

**Figure SI6.** PL spectra of CsPbBr<sub>3</sub> (green) and I-exchanged CsPb(Br:I)<sub>3</sub> (orange) recorded from solutions (continuous lines) and from thin films of NCs deposited on a substrate (dotted lines). The parent CsPbBr<sub>3</sub> retain their PL with a drop of PLQY from 78% to 34% whereas the exchanged NCs exhibit a small 5 nm red shift and a PLQY drop from 28% to 9.1%.

## TEM analysis of anion exchanged NCs

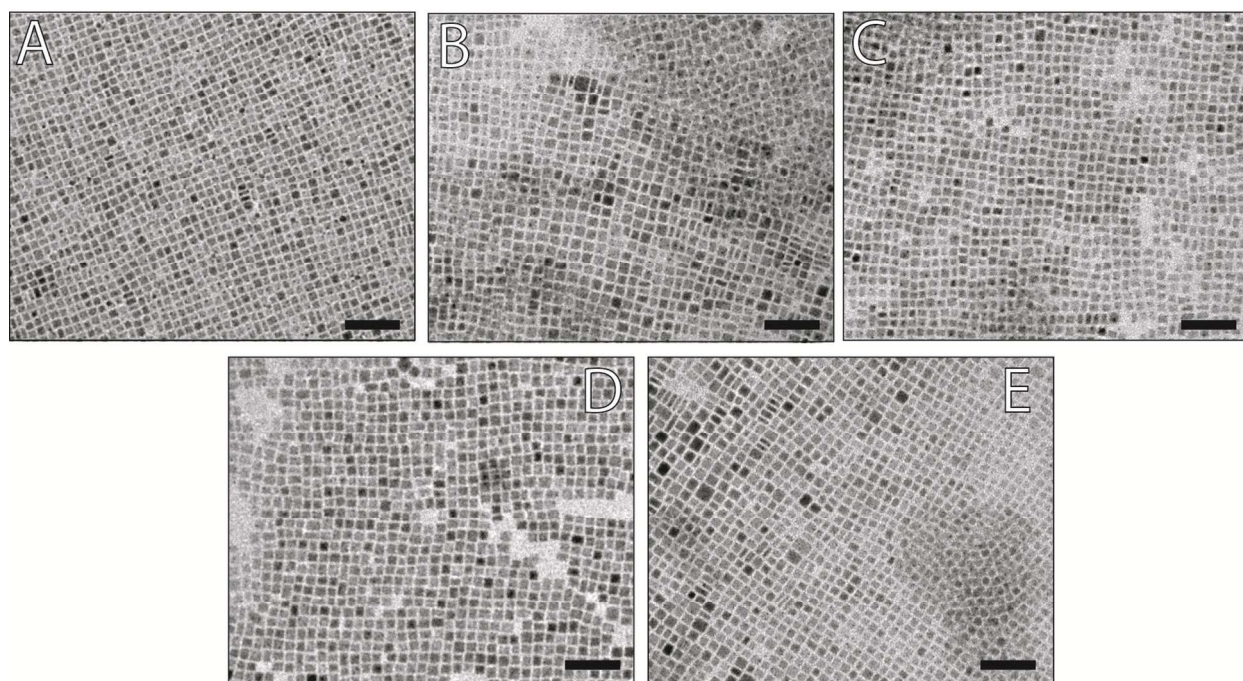

**Figure SI7.** TEM images of pristine CsPbBr<sub>3</sub> NCs (panel C), of the anion exchanged CsPbCl<sub>3</sub> (panel A), CsPbI<sub>3</sub> (panel E) and of two intermediate Cl<sup>-</sup> (panel B) and I<sup>-</sup> (panel D) exchanged samples. Scale bars correspond to 50 nm.

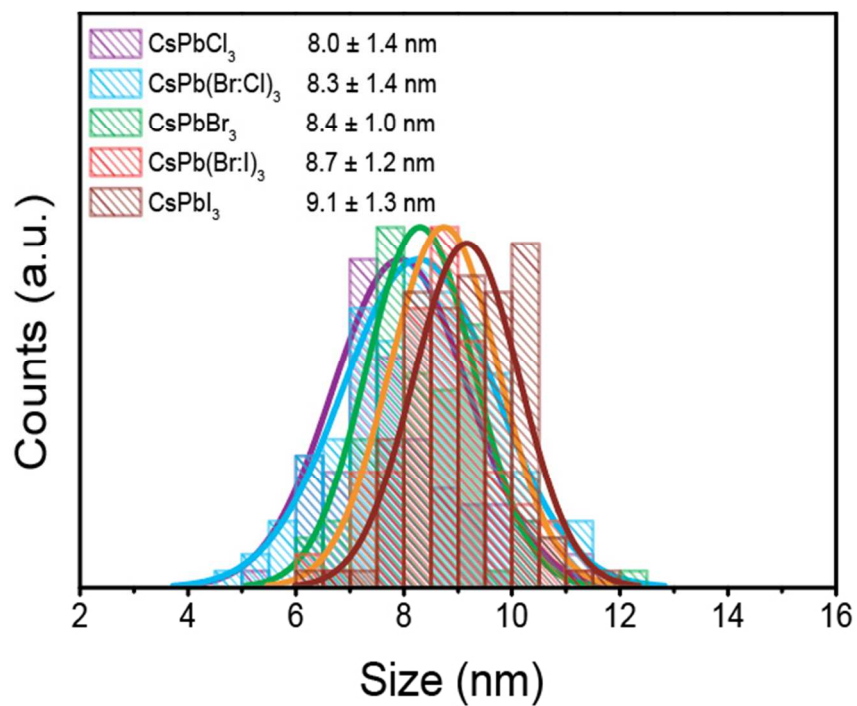

**Figure SI8.** Size distribution of the CsPbX<sub>3</sub> NCs whose TEM images are reported in figure SI7, as determined by size analysis on more than 100 NCs.



Comparison of full XRD patterns of CsPbX<sub>3</sub> NCs obtained by direct synthesis with those of the NCs prepared by anion exchange reactions.

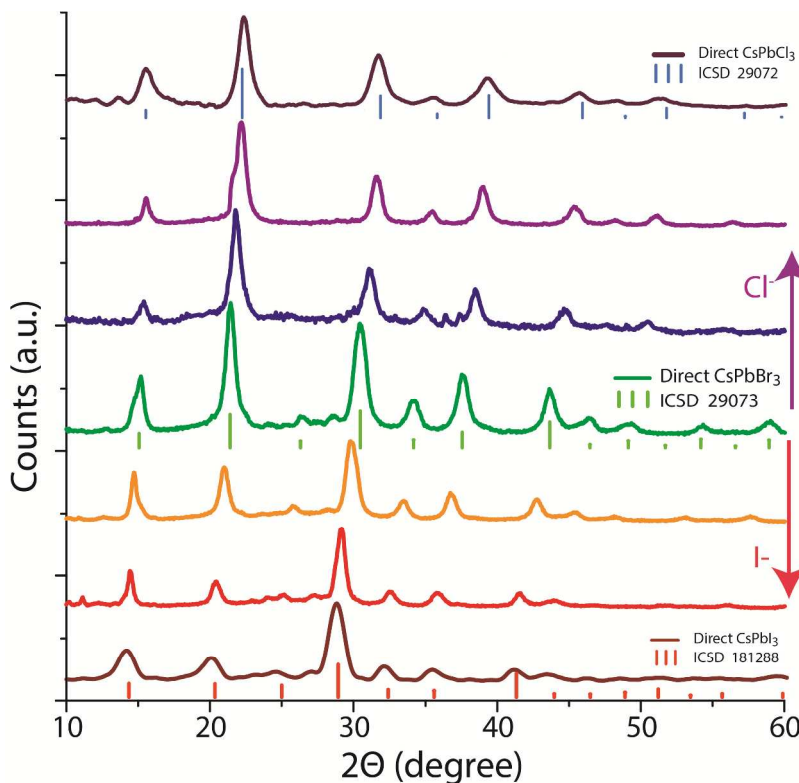

**Figure S19.** Full XRD patterns of directly synthesized CsPbX<sub>3</sub> NCs (top: CsPbCl<sub>3</sub>, middle: CsPbBr<sub>3</sub>; bottom: CsPbI<sub>3</sub>), together with those of the NCs prepared by anion exchange, starting from CsPbBr<sub>3</sub>.

Exchange reaction with MA-Br.

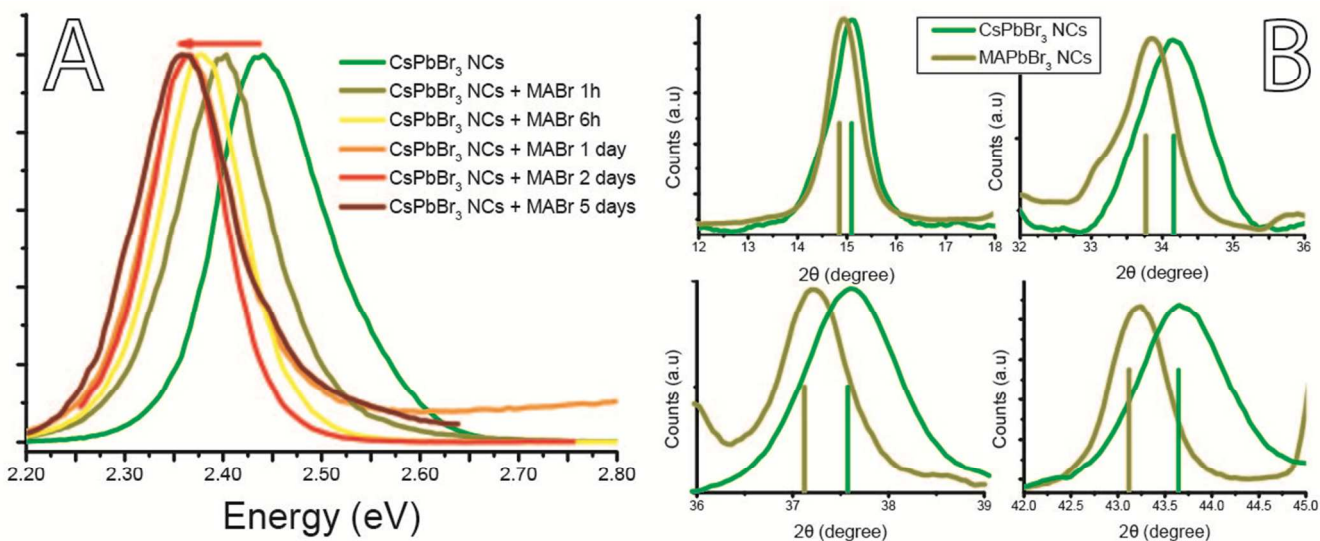

**Figure S10.** (A) Photoluminescence (PL) spectra of CsPbBr<sub>3</sub> NCs upon reaction with MA-Br. A shift from 2.43 eV to 2.36 eV could be observed 24 h after mixing the NCs with MA-Br (due to the exchange of Cs<sup>+</sup> ions with MA<sup>+</sup> ions), with no further shift over the following days. (B) Details of XRD patterns. A shift of the diffraction peaks to lower angles was observed, due to the expansion of the crystal structure with the increasing cationic radius, from Cs<sup>+</sup> (1.81 Å) to MA<sup>+</sup> (2.70 Å) (see Figure S10B).<sup>4</sup> The straight lines correspond to the bulk peak positions of CsPbBr<sub>3</sub> (ICSD 29073) and of MAPbBr<sub>3</sub>, as reported by Schmidt et al.<sup>5</sup>

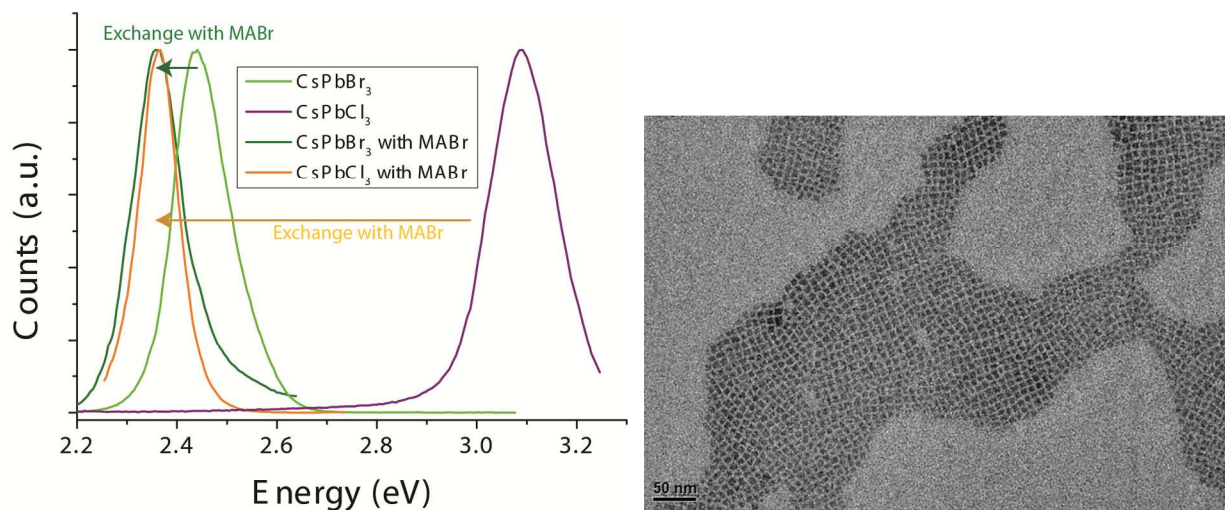

**Figure S11.** (Left) PL spectra of starting CsPbX<sub>3</sub> (X = I, Cl) NCs and of the corresponding final samples obtained by reaction with MA-Br. (Right) TEM image of CsPbBr<sub>3</sub> NCs after exposure to MA-Br. The average size of the NCs is  $7.2 \pm 0.8$  nm.

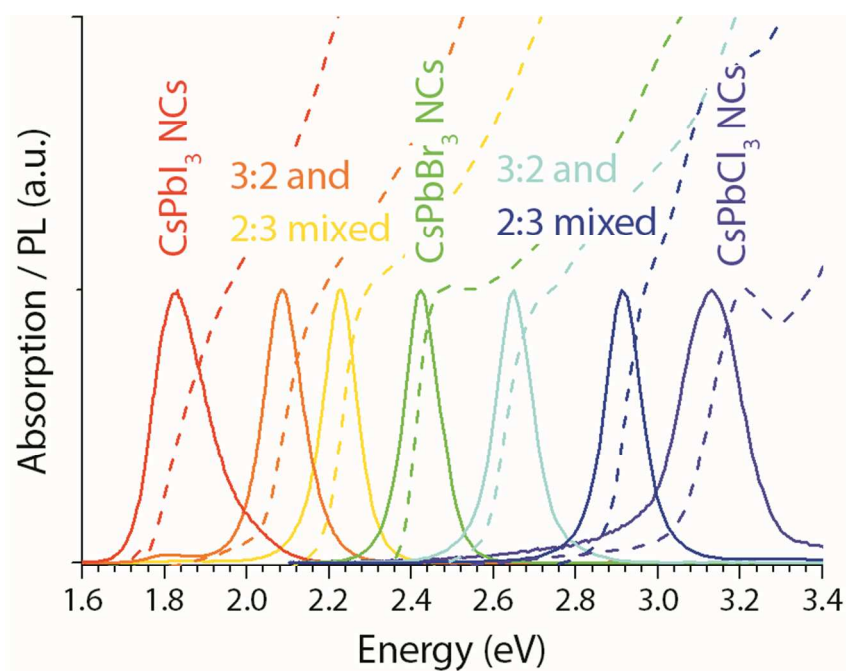

**Figure S12.** Absorption and PL spectra of solutions prepared by mixing two solutions of CsPbBr<sub>3</sub> and CsPbCl<sub>3</sub> (or CsPbI<sub>3</sub>) NCs. Here, crude solution were mixed in either 3:2 or 2:3 ratios and resulted in CsPb(Br:Cl)<sub>3</sub> and CsPb(Br:I)<sub>3</sub> NC samples emitting in spectral regions that were intermediate compared to those of the parent solutions. A 1:1 mixing ratio was instead used for the samples reported in Figure 4C of the main text.

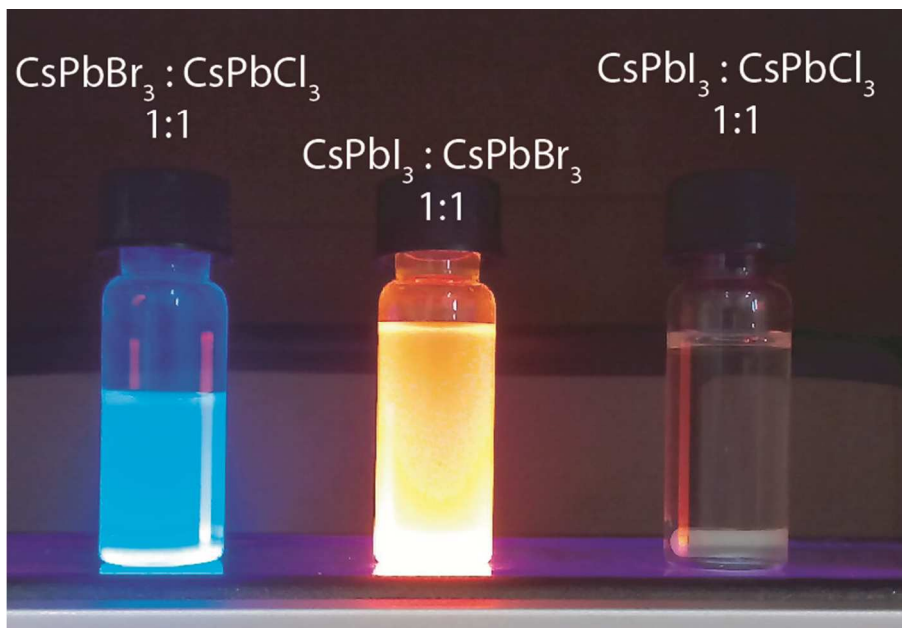

**Figure S13.** A photograph of vials containing mixtures of 1:1  $\text{CsPbCl}_3$ : $\text{CsPbBr}_3$  NCs (left),  $\text{CsPbI}_3$ : $\text{CsPbBr}_3$  NCs (middle) and  $\text{CsPbCl}_3$ : $\text{CsPbI}_3$  NCs (right). A magnetic stir bar is present in each vial. The vials are sitting on a UV lamp. No PL was observed from the sample on the right.

### Additional References

- (1) Protesescu, L.; Yakunin, S.; Bodnarchuk, M. I.; Krieg, F.; Caputo, R.; Hendon, C. H.; Yang, R. X.; Walsh, A.; Kovalenko, M. V. *Nano Lett.* **2015**, doi: 10.1021/nl5048779.
- (2) Tan, Z. K.; Moghaddam, R. S.; Lai, M. L.; Docampo, P.; Higler, R.; Deschler, F.; Price, M.; Sadhanala, A.; Pazos, L. M.; Credgington, D.; Hanusch, F.; Bein, T.; Snaith, H. J.; Friend, R. H. *Nat. Nanotechnol.* **2014**, *9*, 687-692.
- (3) Edri, E.; Kirmayer, S.; Kulbak, M.; Hodes, G.; Cahen, D. *J. Phys. Chem. Lett.* **2014**, *5*, 429-433.
- (4) Boix, P. P.; Agarwala, S.; Koh, T. M.; Mathews, N.; Mhaisalkar, S. G. *J. Phys. Chem. Lett.* **2015**, *6*, 898-907.
- (5) Schmidt, L. C.; Pertegás, A.; González-Carrero, S.; Malinkiewicz, O.; Agouram, S.; Mínguez Espallargas, G.; Bolink, H. J.; Galian, R. E.; Pérez-Prieto, J. *J. Am. Chem. Soc.* **2014**, *136*, 850-853.
